# Supplementary material for: Residual polymer stabiliser causes anisotropic conductivity in metal nanoparticle 2D and 3D printed electronics
Source: Research Square preprint supplement (doi:10.21203/rs.3.rs-86443/v1), 2020-10-29
Supplement: Supplementary file 1 [file 3aa40bbd4ad10e240330b104.pdf]

## Supplementary information

# Residual polymer stabiliser causes anisotropic conductivity in metal nanoparticle 2D and 3D printed electronics

*Gustavo F. Trindade<sup>\*1,2</sup>, Feiran Wang<sup>2</sup>, Yinfeng He<sup>2</sup>, Jisun Im<sup>2</sup>, Adam Balogh<sup>2</sup>, David Scurr<sup>1</sup>, Ian Gilmore<sup>3</sup>, Mariavitalia Tiddia<sup>3</sup>, Ehab Saleh<sup>2,4</sup>, David Pervan<sup>2</sup>, Lyudmila Turyanska<sup>2</sup>, Christopher J. Tuck<sup>2</sup>, Ricky Wildman<sup>2</sup>, Richard Hague<sup>2</sup>, Clive J. Roberts<sup>\*1</sup>*

<sup>1</sup> Advanced Materials and Healthcare Technologies, School of Pharmacy, University of Nottingham, University Park, Nottingham, NG7 2RD, UK

<sup>2</sup> Centre for Additive Manufacturing, Faculty of Engineering, University of Nottingham, Jubilee Campus, Nottingham, NG7 2RD, UK

<sup>3</sup> National Physical Laboratory, Hampton Road, Teddington TW11 0LW, UK

<sup>4</sup> School of Chemical and Process Engineering, University of Leeds, Leeds, LS2 9JT, UK

\*CORRESPONDING AUTHOR(S):

*Gustavo.FerrazTrindade@nottingham.ac.uk and Clive.Roberts@nottingham.ac.uk*

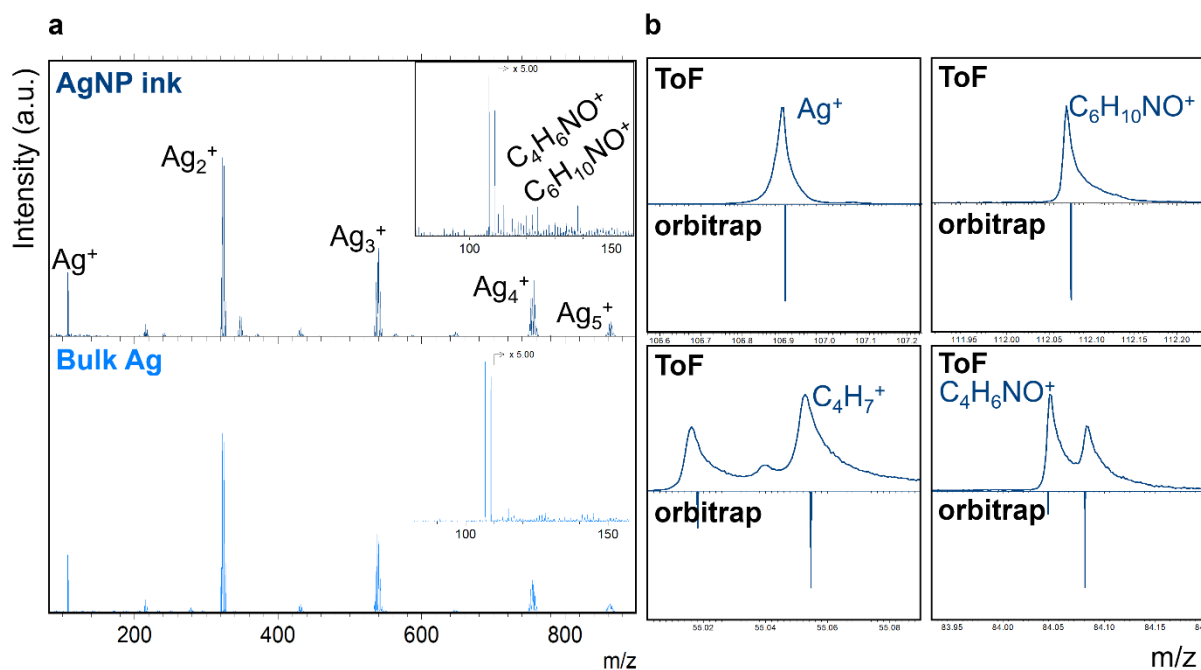

**Fig. S1** Unambiguous identification of PVP in inkjet-printed AgNPs (arbitrary intensities). **a** Measured spectra for AgNP (top) and reference bulk Ag (bottom). The inserts show a zoomed-in view with characteristic PVP peaks indicated. **b** High resolution view of peaks of main secondary ions of interest. The top curves show the ToF-SIMS signal and the bottom curves show the orbitSIMS. The orbitrap data confirms that there is no interference within the ToF peaks of interest.

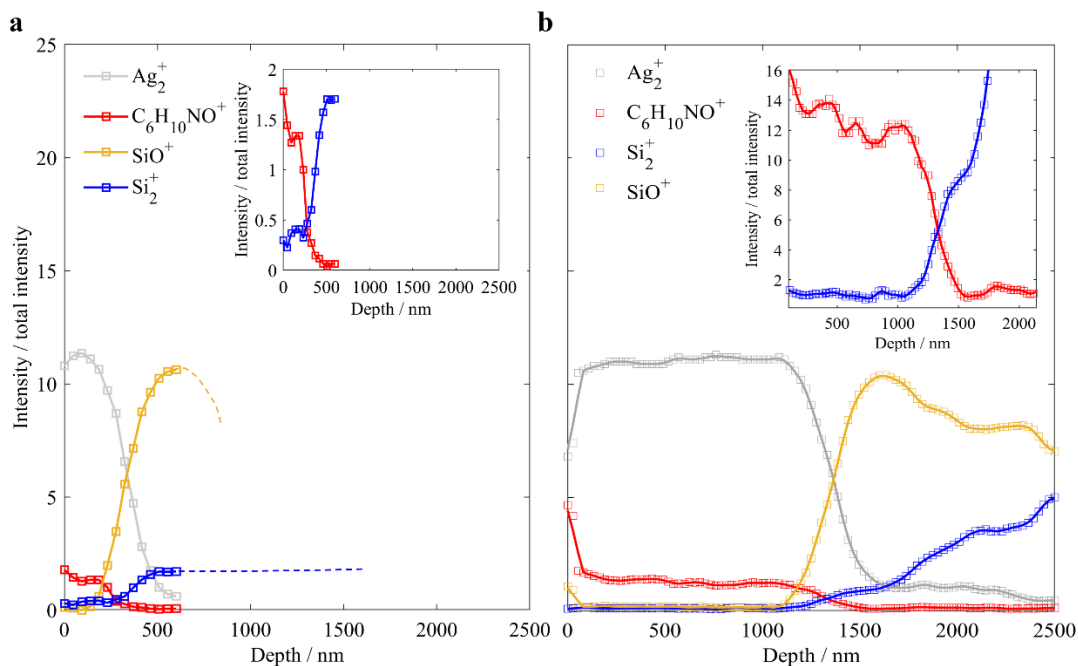

**Fig. S2** ToF-SIMS depth profiles of **a** 1 printed layer and **b** 4 printed layers of AgNP samples.

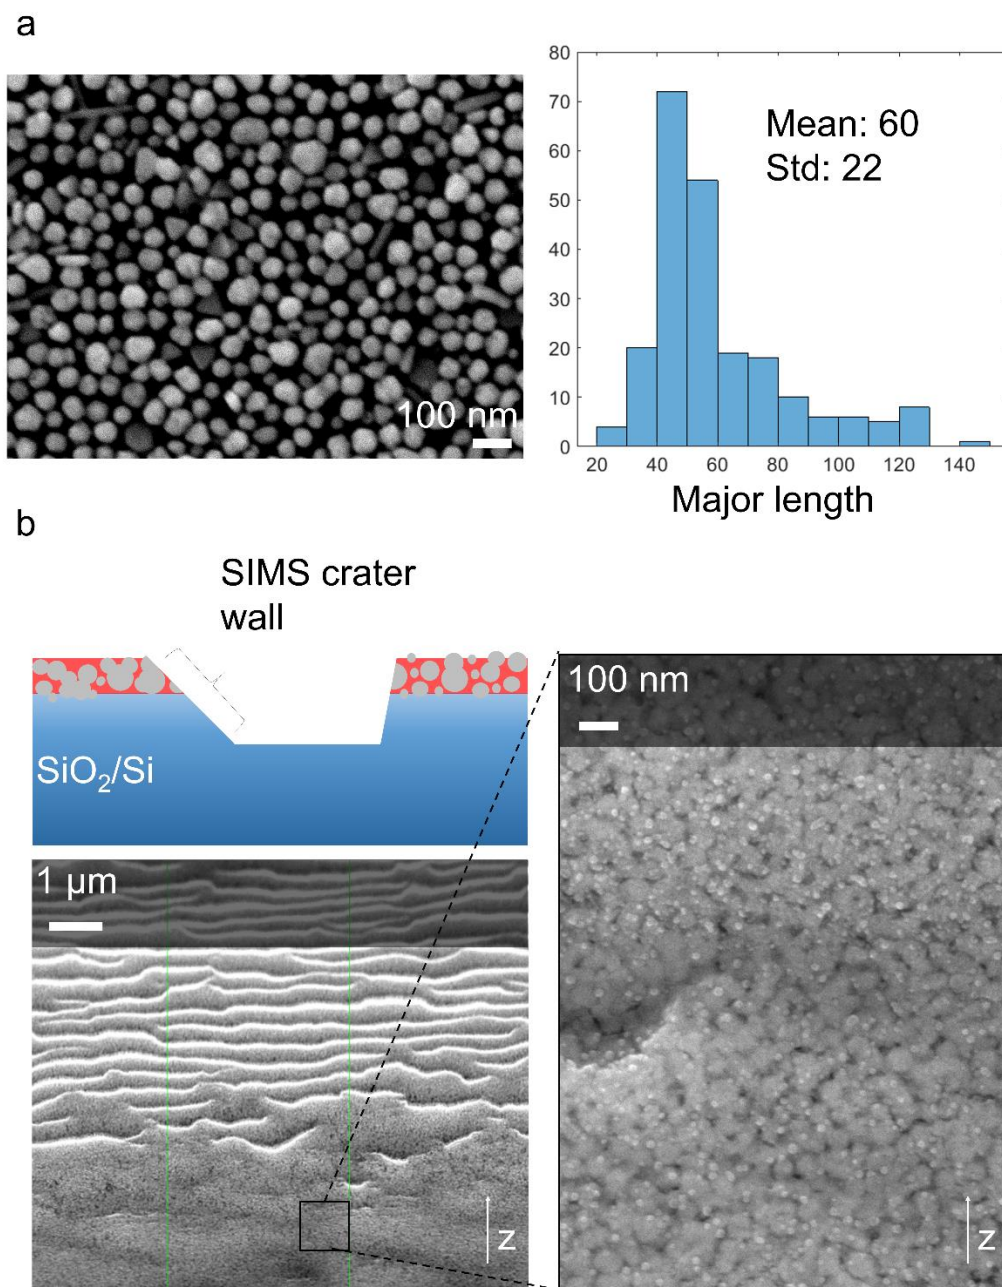

**Fig. S3 a** Electron micrograph and AgNPs size distribution of the silver ink. **b** Electron micrograph of the ToF-SIMS crater wall after depth profiling.

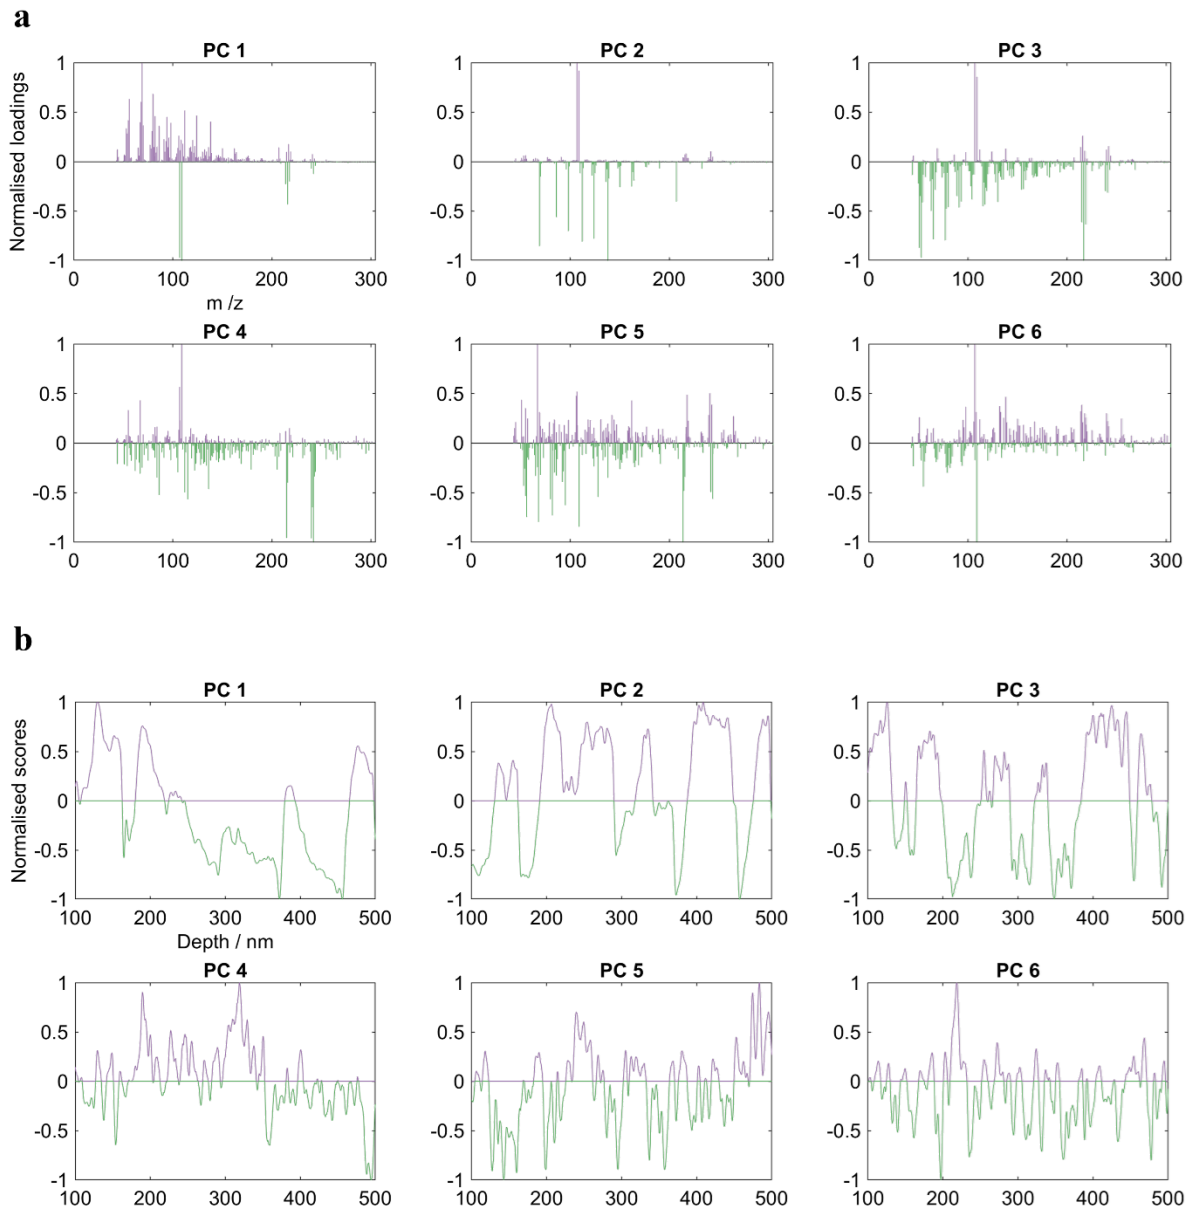

**Fig. S4** Principal component analysis results of the ToF-SIMS depth profiling data within a single printed layer of the AgNPs ink. Depth levels are used as observations and secondary ion mass peaks are used as variables. **a** Loadings. **b** Scores

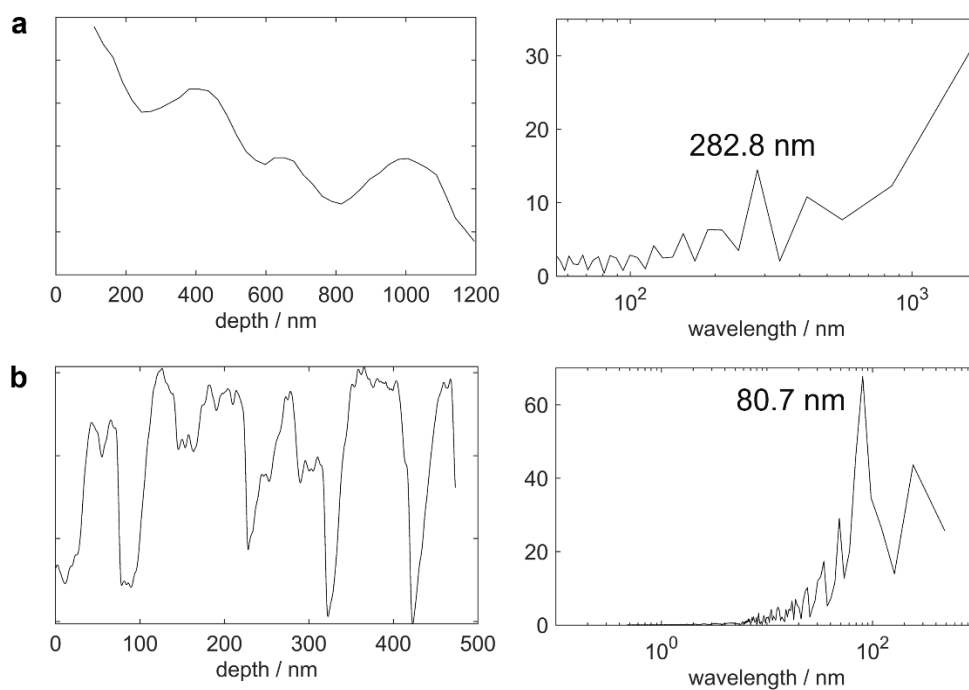

**Fig. S5:** Estimation of period of repeating patterns by Fast Fourier transforms of the ToF-SIMS depth profiling data within **a** 4 printed layers and **b** 1 printed layer (with higher depth resolution).

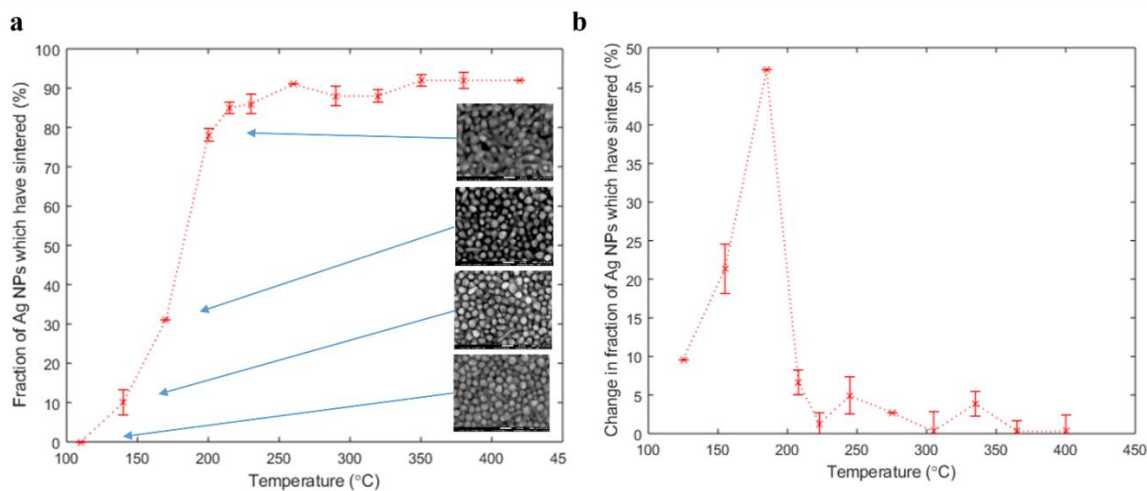

**Fig. S6:** **a** fraction of Ag NPs which have sintered against temperature. Exemplary images are included with arrow indications to the correspond data points. Error bars indicate standard deviation. **b** Change in fraction of Ag NPs which have sintered with increasing temperature. Error bars indicate standard deviation.

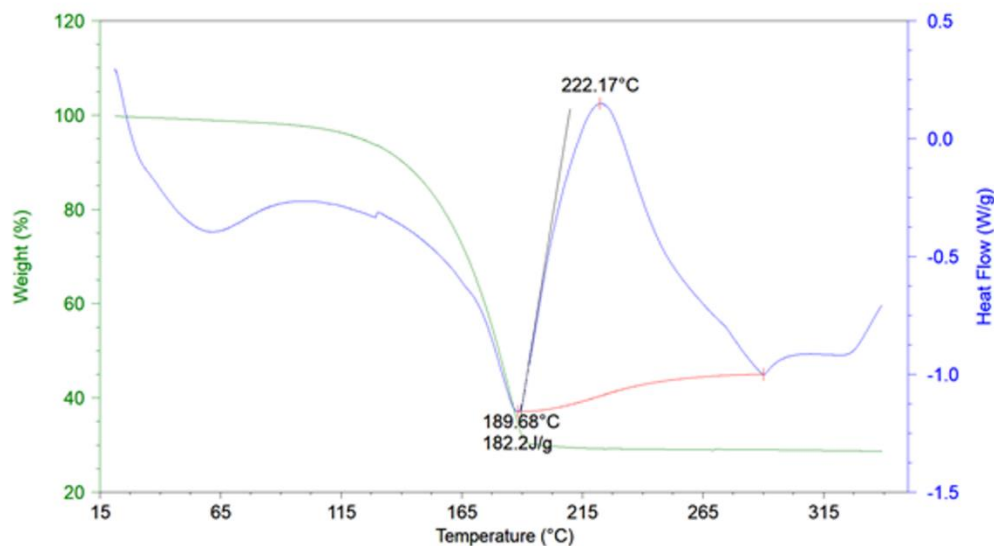

**Fig. S7** Simultaneous DSC/TGA measurements of the AgNP ink. Data reveal weight loss of approximately 70% by  $T = 190^{\circ}\text{C}$ . We attribute this to the evaporation of the solvent present in the ink. The DSC measurement shows an exothermic peak believed to be the result of NP sintering up to  $T = 290^{\circ}\text{C}$ .

**Table ST1:** XPS peak fitting for C1s spectra of printed AgNPs sintered at different temperatures and corresponding estimated compositions.

|       | GROUP | POSITIO<br>N(EV) | FWHM<br>(EV) | AREA    | CORREC<br>TED AREA | ATOMIC<br>CONC (%) |
|-------|-------|------------------|--------------|---------|--------------------|--------------------|
| RT    | C-C   | 284.82           | 1.39         | 1687.44 | 2143.31            | 58.3               |
|       | N-C=O | 287.6            | 1.39         | 271.477 | 344.859            | 9.38               |
|       | C-N   | 286.38           | 1.39         | 542.954 | 689.681            | 18.76              |
|       | C-O   | 289.28           | 1.39         | 109.143 | 498.759            | 13.57              |
| 100°C | C-C   | 284.78           | 1.27         | 1459.87 | 1854.25            | 63.13              |
|       | N-C=O | 287.42           | 1.27         | 172.05  | 218.552            | 7.44               |
|       | C-N   | 286.2            | 1.27         | 344.1   | 437.082            | 14.88              |
|       | C-O   | 288.89           | 1.27         | 93.506  | 427.291            | 14.55              |
| 150°C | C-C   | 284.8            | 1.31         | 1805.19 | 2292.9             | 73.89              |
|       | N-C=O | 287.59           | 1.31         | 166.357 | 211.327            | 6.81               |
|       | C-N   | 286.24           | 1.31         | 332.713 | 422.629            | 13.62              |

|              |       |        |      |         |         |       |
|--------------|-------|--------|------|---------|---------|-------|
| <b>230°C</b> | C-O   | 289.01 | 1.31 | 38.5496 | 176.163 | 5.68  |
|              | C-C   | 284.85 | 1.32 | 1345.51 | 1709.03 | 66.05 |
|              | N-C=O | 287.66 | 1.32 | 138.667 | 176.151 | 6.81  |
|              | C-N   | 286.3  | 1.32 | 277.334 | 352.282 | 13.62 |
|              | C-O   | 289.21 | 1.32 | 76.5669 | 349.895 | 13.52 |

**Table ST2:** XPS peak fitting for N1s spectra of printed AgNPs sintered at different temperatures and corresponding estimated compositions.

|                           |        | <b>POSITION<br/>(EV)</b> | <b>FWHM (EV)</b> | <b>AREA</b> | <b>CORRECTED<br/>AREA</b> | <b>ATOMIC<br/>CONC (%)</b> |
|---------------------------|--------|--------------------------|------------------|-------------|---------------------------|----------------------------|
| <b>RT<br/>SURFACE</b>     | C-N-Ag | 397.83                   | 1.25             | 114.064     | 294.412                   | 63.82                      |
|                           | C-N    | 399.79                   | 1.61             | 64.7248     | 166.897                   | 36.18                      |
| <b>RT BULK</b>            | C-N-Ag | 398.8                    | 1                | 1.00E-20    | 2.58E-20                  | 0                          |
|                           | C-N    | 400.69                   | 1.21             | 33.7063     | 86.8754                   | 100                        |
| <b>100 °C<br/>SURFACE</b> | C-N-Ag | 399                      | 1.54             | 133.438     | 344.199                   | 71.42                      |
|                           | C-N    | 400.8                    | 1.7              | 53.4481     | 137.745                   | 28.58                      |
| <b>100 °C<br/>BULK</b>    | C-N-Ag | 398.01                   | 1.7              | 57.7153     | 148.94                    | 34.82                      |
|                           | C-N    | 399.88                   | 1.7              | 108.148     | 278.827                   | 65.18                      |
| <b>150 °C<br/>SURFACE</b> | C-N-Ag | 398.04                   | 1.7              | 164.003     | 423.311                   | 65.79                      |
|                           | C-N    | 400.51                   | 1.7              | 85.3673     | 220.082                   | 34.21                      |
| <b>150 °C<br/>BULK</b>    | C-N-Ag | 398.09                   | 1.7              | 98.3761     | 253.907                   | 58.06                      |
|                           | C-N    | 400.74                   | 1.26             | 71.1677     | 183.447                   | 41.94                      |
| <b>230 °C<br/>SURFACE</b> | C-N-Ag | 398.21                   | 1.43             | 83.444      | 215.389                   | 40.7                       |
|                           | C-N    | 400.54                   | 1.7              | 121.726     | 313.849                   | 59.3                       |
| <b>230 °C<br/>BULK</b>    | C-N-Ag | 398.23                   | 1.7              | 29.3323     | 75.7025                   | 23.68                      |
|                           | C-N    | 400.57                   | 1.38             | 94.6347     | 243.961                   | 76.32                      |
